# Supplementary material for: Magnetic memory effect in self-assembled nickel ferrite nanoparticles having mesoscopic void spaces
Source: Royal Society of Chemistry journal article supplement (doi:10.1039/c6ra05483h), 2016-01-01
Supplement: c6ra05483h1.pdf [file c6ra05483h1.pdf]

Magnetic memory effect in self-assembled nickel ferrite nanoparticles  
having mesoscopic void spaces

Vandana Kumari,<sup>a</sup> Koushik Dey,<sup>b</sup> Saurav Giri\*,<sup>b</sup> and Asim Bhaumik\*,<sup>a</sup>

**Figure S1** Magnetic separation of magnetic  $\text{NiFe}_2\text{O}_4$  nanomaterials from water by an external magnet after 10s.

**Figure S2** Particle size histogram from the TEM analysis and a representative image.

**Figure S3** Elemental mapping of  $\text{NiFe}_2\text{O}_4$ .

**Table S1** Rietveld refined structural parameters.

**Figure S1**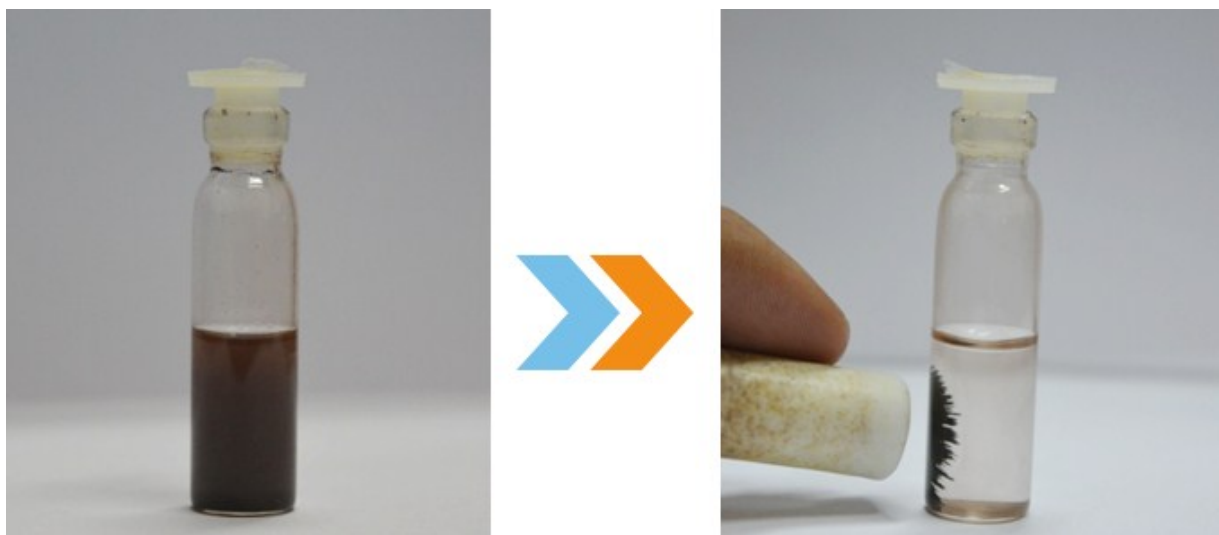

**Figure S1.** Magnetic separation of mesoporous  $\text{NiFe}_2\text{O}_4$  nanomaterials from its dispersion in water by an external magnet after 10s.

Figure S2

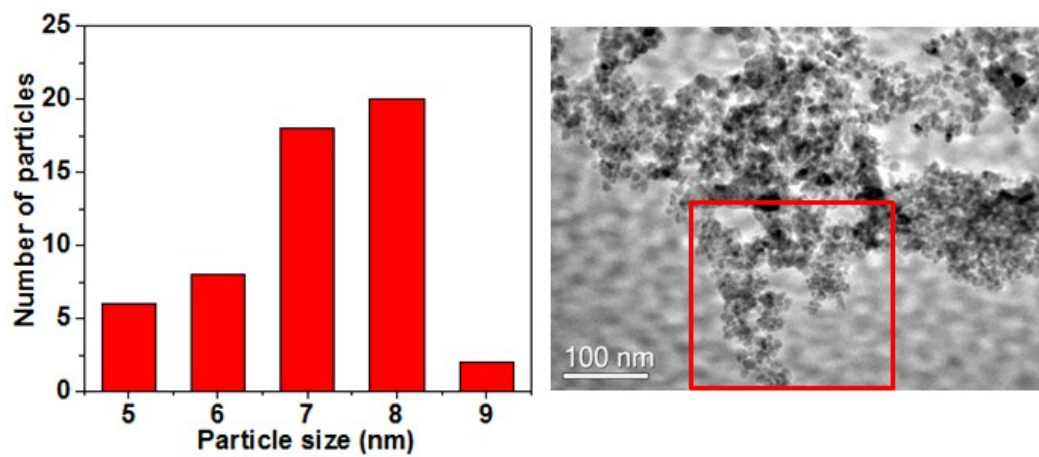

**Figure S2.** Particle size distribution histogram from the TEM analysis and a representative TEM image.

Figure S3

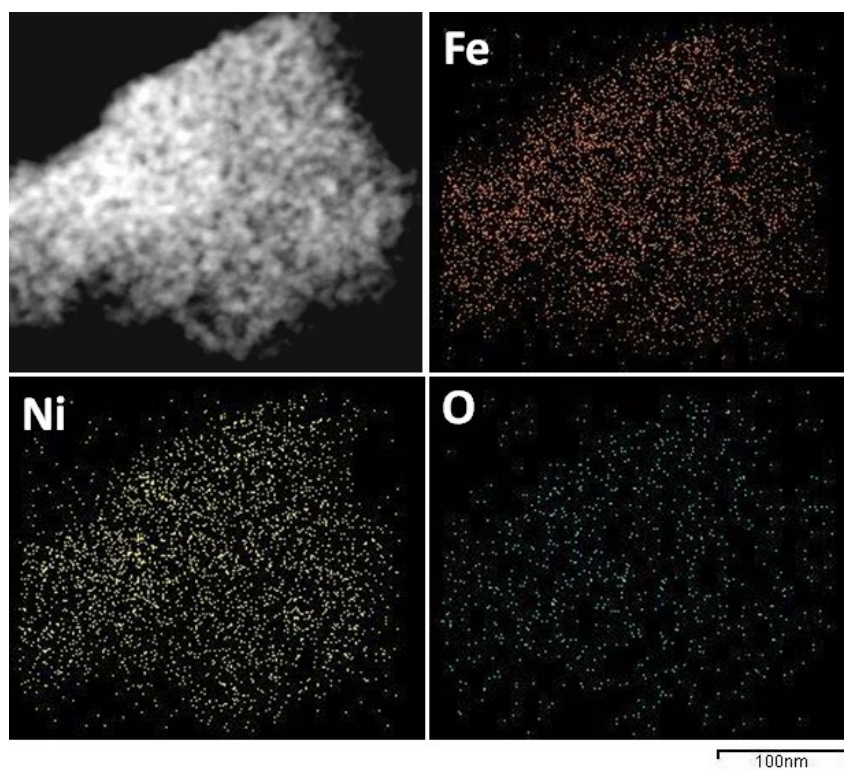**Figure S3.** Elemental mapping of mesoporous  $\text{NiFe}_2\text{O}_4$ .

Table S1

Rietveld refined structural parameters

Space Group: Fd-3m

| Atom | x(Å)      | y(Å)      | z(Å)      |
|------|-----------|-----------|-----------|
| Fe   | 0.125     | 0.125     | 0.125     |
| Ni   | 0.5       | 0.5       | 0.5       |
| O    | 0.2538(4) | 0.2538(4) | 0.2538(4) |
